# Supplementary material
Source: ML conference proceedings conference paper supplement (https://proceedings.neurips.cc/paper_files/paper/2022/hash/3be14af22f0b311325664277f48111f4-Abstract.html)
Supplement: Supplementary file 1 [file 3be14af22f0b311325664277f48111f4-Supplemental-Conference.zip]

Archive with 2 entries (2 files):
- Interacting_ODEs_with_Gaussian_Processes (11).pdf
- __MACOSX/._Interacting_ODEs_with_Gaussian_Processes (11).pdf
